# Supplementary material
Source: Springer Nature journal article supplement (https://www.springermedizin.de/resource/supplementary/12916_2011_432_MOESM8_ESM.pdf/9599938)

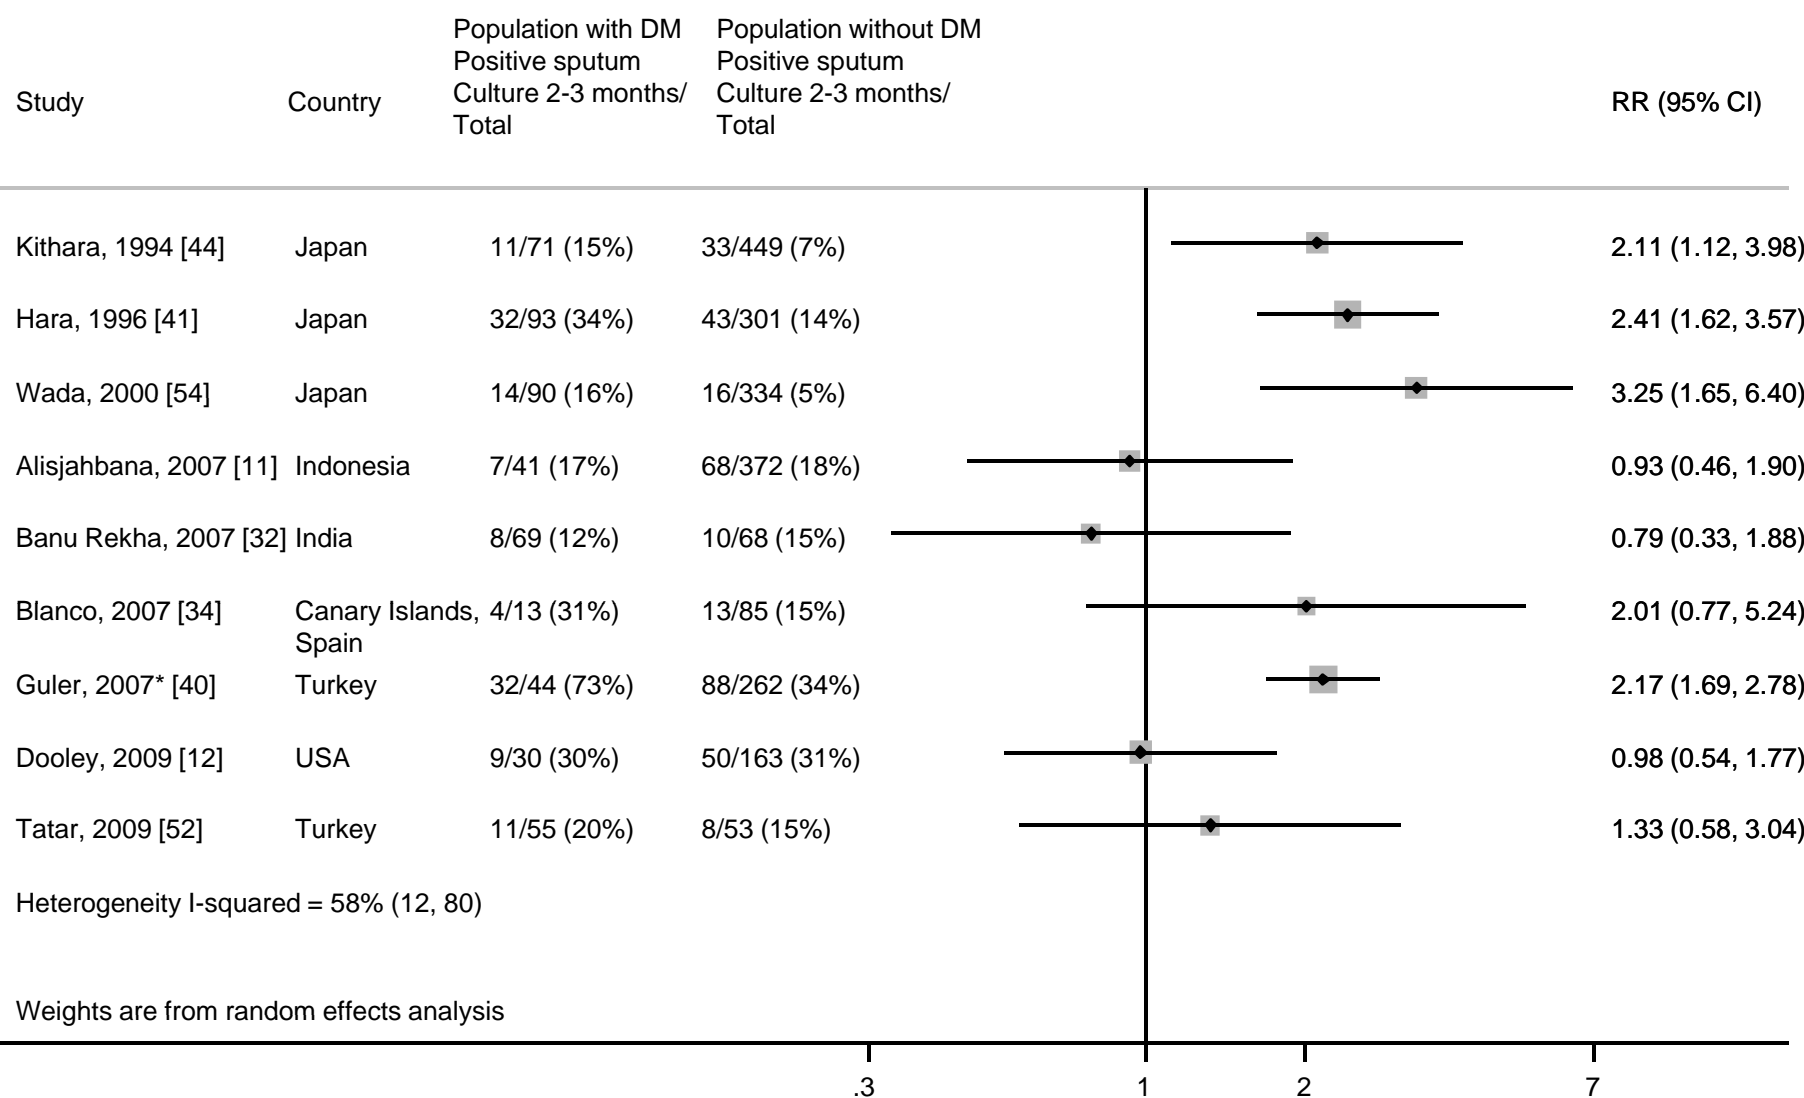

.3

1

2

7

Supplement: MOESM8 [file 9599938]
